# Supplementary material
Source: PubMed Central journal article supplement (PMC3257371)
Supplement: NIHMS338162-supplement-01.pdf [file NIHMS338162-supplement-01.pdf]

644 **SUPPORTING INFORMATION**

645 **Supplementary Figures**

646 S1. Body weight of B6D2F1 mice from the National Institute of Aging (NIA) calorically  
647 restricted (CR) colony and ad lib controls (AL) purchased from NIA housed acutely (A, n = 5-7  
648 per group) and for six weeks (B, n = 8 per group). \*Significant difference between AL and CR, p  
649  $\leq 0.05$ , #Significant effect of age,  $p \leq 0.05$ .

650

651 S2. Assessment of COX4 by western blot. N=5 per group.

652

653 S3. Quantitative PCR array of genes affecting mitochondrial biogenesis. \*Significant difference  
654 between AL and CR,  $p \leq 0.05$ , #Significant effect of age,  $p \leq 0.05$ . n = 5 per group.

655

656 S4. Assessment of phospho and total AMPK by western blot. \*Significant difference between  
657 AL and CR,  $p \leq 0.05$ . n = 5 per group.
